# Supplementary material for: Systematic review and meta-analysis: real-world effectiveness of direct-acting antiviral therapies in chronic hepatitis C genotype 3 in Asia
Source: PubMed Central journal article supplement — BMJ Open Gastroenterol. 2018 Aug 20;5(1):e000209. doi: 10.1136/bmjgast-2018-000209 (PMC6104766; doi:10.1136/bmjgast-2018-000209), 2018-08-20
Supplement: bmjgast-2018-000209supp001.pdf [file bmjgast-2018-000209supp001.pdf]

## Online Supplemental Data

# Systemic Review and Meta-analyses: Real-World Effectiveness of Direct-acting Antiviral Therapies in Chronic Hepatitis C Genotype 3 in Asia

Bin Wei\*<sup>1</sup>, Fanpu Ji\*<sup>1,2,3</sup>, Yee Hui Yeo<sup>1</sup>, Eiichi Ogawa<sup>1,4</sup>, Christopher D. Stave<sup>5</sup>, Shuangsoo Dang<sup>2</sup>, Zongfang Li<sup>3,6</sup>, Norihiro Furusyo<sup>4</sup>, Ramsey C. Cheung<sup>1,7</sup>, Mindie H. Nguyen<sup>1</sup>

|                                                                                                                                                                                                                     |   |
|---------------------------------------------------------------------------------------------------------------------------------------------------------------------------------------------------------------------|---|
| <b>Online Supplementary 1:</b> Table S1 SVR12 of DAA therapies in Asia meta-analyses of real-world studies and global clinical trials in HCV GT3 patients .....                                                     | 2 |
| <b>Online Supplementary 2:</b> Table S2 Quality assessment of the included studies .....                                                                                                                            | 3 |
| <b>Online Supplementary 3:</b> Table S3 Sensitivity analyses by study setting, sample size and quality assessment score.....                                                                                        | 4 |
| <b>Online Supplementary 4:</b> Figure S1 Forest plot for sustained virologic response (SVR 12) in chronic hepatitis C genotype 3 patients treated with DAAs in Asia by regimens.....                                | 5 |
| <b>Online Supplementary 5:</b> Figure S2 Forest plot for sustained virologic response (SVR 12) in chronic hepatitis C genotype 3 patients treated with DAAs in Asia by treatment history.....                       | 6 |
| <b>Online Supplementary 6:</b> Figure S3 Forest plot for sustained virologic response (SVR 12) in chronic hepatitis C genotype 3 patients treated with DAAs in Asia by cirrhosis status and treatment history ..... | 7 |
| <b>Online Supplementary 7:</b> Figure S4 Forest plot for sustained virologic response (SVR 12) in chronic hepatitis C genotype 3 patients treated with DAAs in Asia by country .....                                | 8 |
| <b>Online Supplementary 8:</b> Supplemental List 1: List of Asian countries and areas included in literature search based on PubMed MeSH term for Asia.....                                                         | 9 |

**Online Supplementary 1:** Table S1 SVR12 of DAA therapies in Asia meta-analyses of real-world studies and global clinical trials in HCV GT3 patients

| Study                |                                | Our study           | VALENCE        | BOSON              | ALLY-3         | Other network meta-analysis* (reference 40)     |
|----------------------|--------------------------------|---------------------|----------------|--------------------|----------------|-------------------------------------------------|
| Study setting        |                                | Real-world practice | Clinical trial | Clinical trial     | Clinical trial | RCTs; single-arm studies; observational cohorts |
| Patient No.          | Total                          | 4230                | 250            | 592 (GT2&GT3)      | 152            | -                                               |
|                      | Asian (%)                      | 4230 (100%)         | 9 (4%)         | 80 (14%) (GT2&GT3) | 7 (5%)         | -                                               |
| SVR12 by DAA Regimen | SOF+RBV for 16 weeks           | -                   | -              | 71%                | -              | -                                               |
|                      | SOF+RBV for 24 weeks           | 93.0%               | -              | 84%                | -              | 87% NC<br>56% LC                                |
|                      | SOF+RBV+PEG-IFN for 12 weeks   | 95.4%               | -              | 93%                | -              | 95% NC<br>78% LC                                |
|                      | DCV+SOF±RBV for 12 or 24 weeks | 91.7%               | -              | -                  | 89%            | 96% NC<br>80% LC                                |
|                      | LDV+SOF for 12 weeks           | 75.0%               | -              | -                  | -              | -                                               |
| SVR12 for GT3        | Overall:                       | 92.7%               | 85%            | 83%                | 89%            | -                                               |
|                      | NC                             | 98.9%               | 91%            | 87%                | 96%            | -                                               |
|                      | LC                             | 88.6%               | 68%            | 73%                | 63%            | -                                               |
|                      | TN                             | 94.6%               | -              | 86%                | 90%            | -                                               |
|                      | TE                             | 94.0%               | -              | 78%                | 86%            | -                                               |

Note: \* This study include regimens other than the five DAA regimens included in our meta-analysis

GT, genotype; DAA, Direct-acting antiviral; NC, non-cirrhosis; LC, liver cirrhosis; TN, treatment naïve; TE, treatment experienced; SVR, sustained virological response;

**Online Supplementary 2:** Table S2 Quality assessment of the included studies

| First Author<br>Published Year | Selection score<br>(4 points) | Comparability<br>score<br>(2 points) | Outcome score<br>(3 points) | Total score<br>(9 points) |
|--------------------------------|-------------------------------|--------------------------------------|-----------------------------|---------------------------|
| Abbas 2017                     | 2                             | 1                                    | 2                           | 5                         |
| Akhter 2016                    | 4                             | 2                                    | 2                           | 8                         |
| Capileno 2017                  | 3                             | 0                                    | 3                           | 6                         |
| Farooqi 2016                   | 3                             | 0                                    | 0                           | 3                         |
| Goel 2017                      | 4                             | 1                                    | 3                           | 8                         |
| Hlaing 2017                    | 3                             | 1                                    | 3                           | 7                         |
| Mehta 2016                     | 3                             | 2                                    | 3                           | 8                         |
| Merta 2017                     | 3                             | 2                                    | 3                           | 8                         |
| Sarwar 2017                    | 2                             | 0                                    | 2                           | 4                         |
| Satsangi 2017                  | 3                             | 2                                    | 2                           | 7                         |
| Shah 2016                      | 2                             | 2                                    | 2                           | 6                         |
| Sidhu 2017                     | 3                             | 2                                    | 3                           | 8                         |
| Sood 2017                      | 4                             | 2                                    | 1                           | 7                         |
| Win 2016                       | 2                             | 0                                    | 1                           | 3                         |
| Yousaf 2017                    | 3                             | 2                                    | 2                           | 7                         |

Note: Quality assessment performed by the developed Newcastle-Ottawa Scale for cohort studies (NOS).

**Online Supplementary 3:** Table S3 Sensitivity analyses by study setting, sample size and quality assessment score

| <b>Study characteristics</b>                                              | <b>Number of studies</b> | <b>N</b> | <b>SVR12 estimate (95%CI)</b> | <b>I<sup>2</sup></b> |
|---------------------------------------------------------------------------|--------------------------|----------|-------------------------------|----------------------|
| <b>Study setting:</b><br>Full-text publication                            | 10                       | 2435     | 91.7% (88.1% - 94.6%)         | 84.4%                |
| <b>Sample size:</b><br>> 100 participants                                 | 9                        | 3885     | 92.3% (87.3% - 96.1%)         | 95.6%                |
| <b>Quality assessment:</b><br>Fair to High-quality studies<br>(score ≥ 4) | 13                       | 4110     | 92.2% (88.1% - 95.6%)         | 93.7%                |

Note: Quality assessment performed by the Newcastle-Ottawa Scale for cohort studies to evaluate risk of bias; SVR 12, sustained virological response 12 weeks after the end of treatment

**Online Supplementary 4:** Figure S1 Forest plot for sustained virologic response (SVR 12) in chronic hepatitis C genotype 3 patients treated with DAAs in Asia by regimens

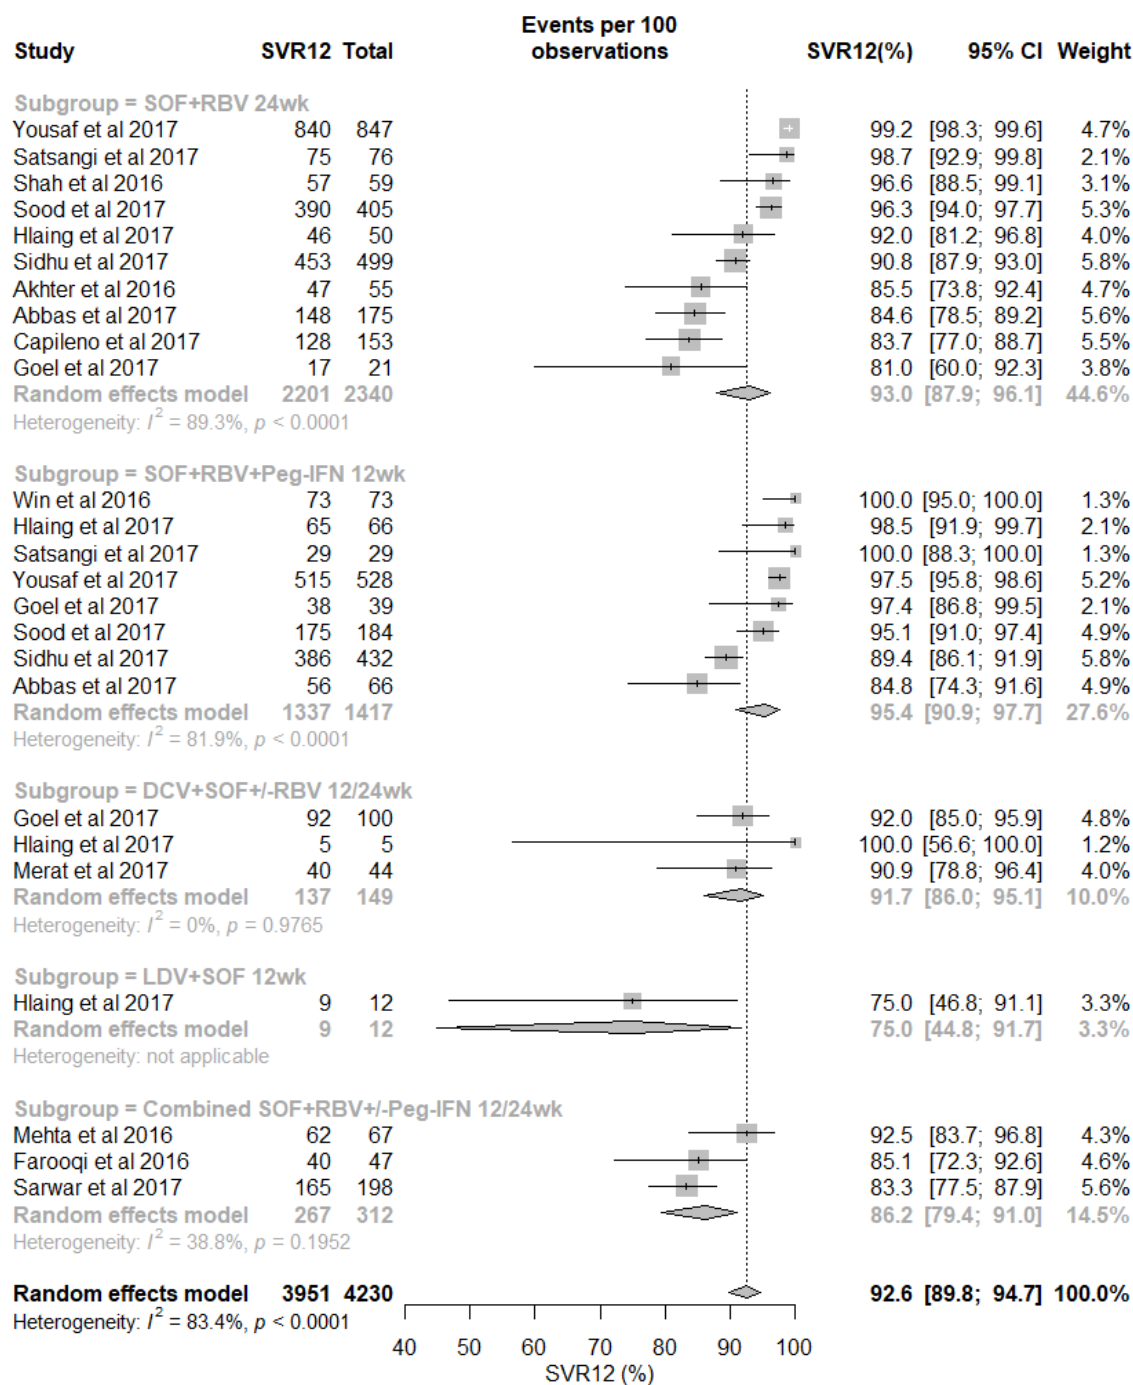

**Online Supplementary 5:** Figure S2 Forest plot for sustained virologic response (SVR 12) in chronic hepatitis C genotype 3 patients treated with DAAs in Asia by treatment history

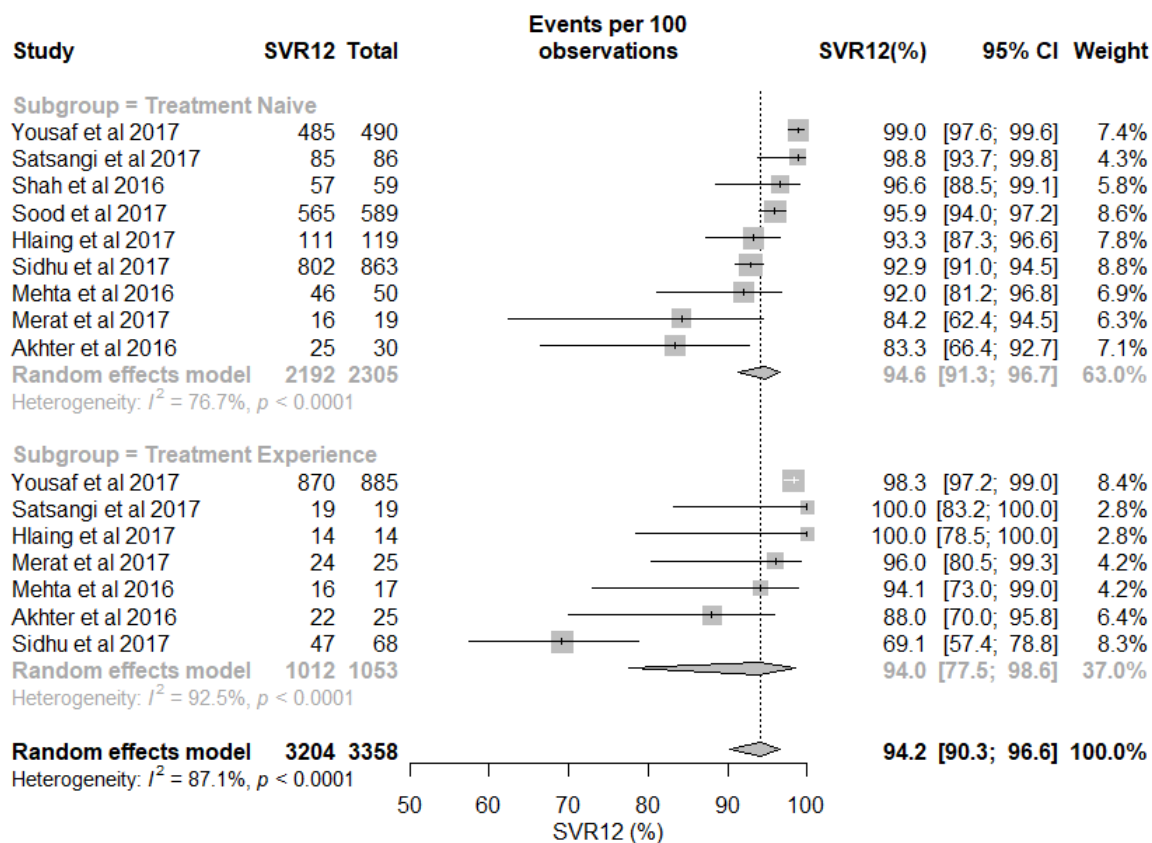

**Online Supplementary 6:** Figure S3 Forest plot for sustained virologic response (SVR 12) in chronic hepatitis C genotype 3 patients treated with DAAs in Asia by cirrhosis status and treatment history

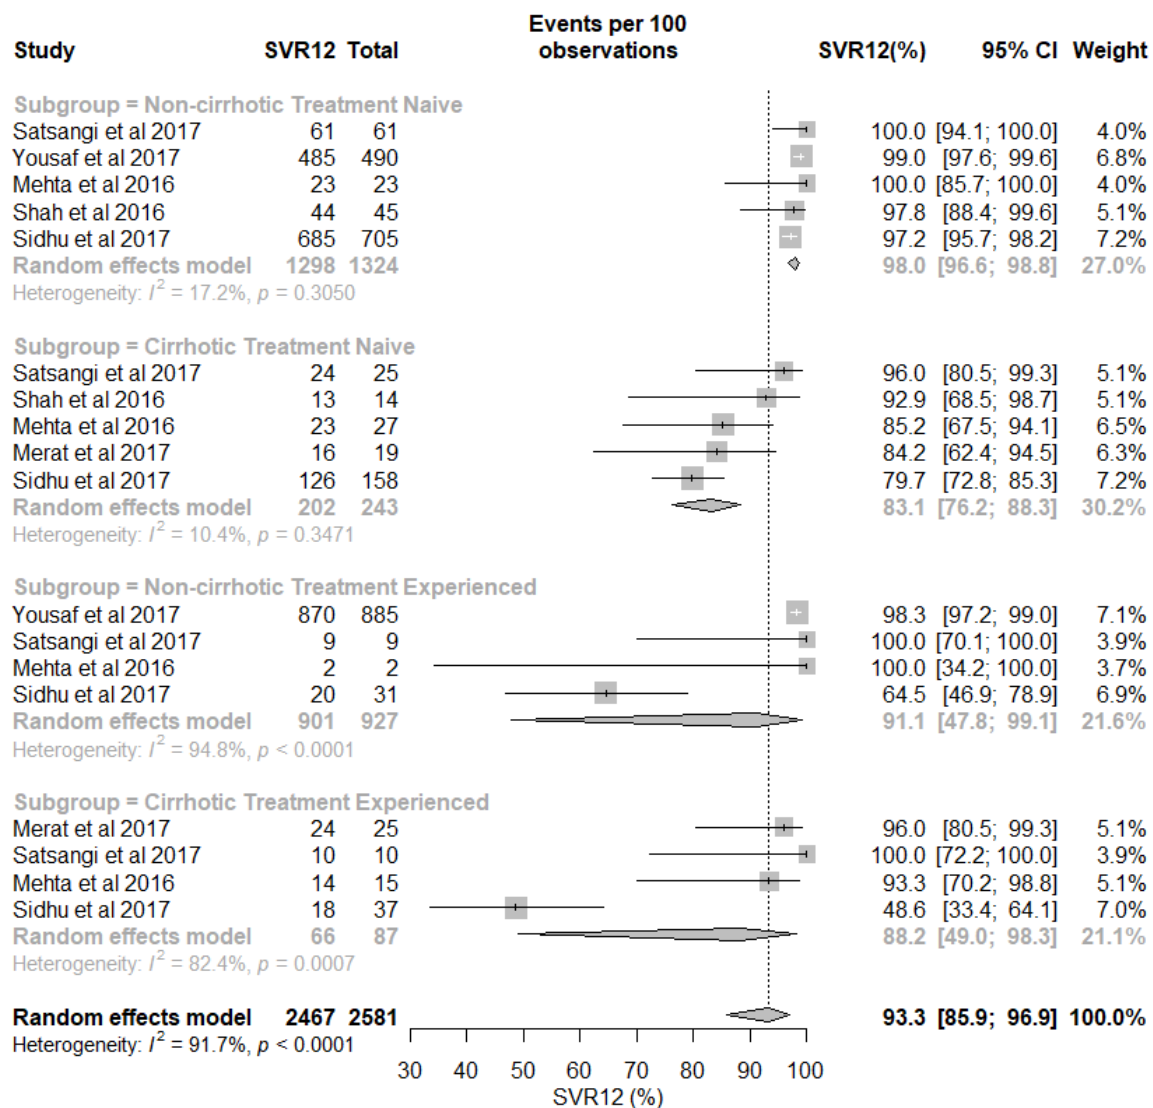

**Online Supplementary 7:** Figure S4 Forest plot for sustained virologic response (SVR 12) in chronic hepatitis C genotype 3 patients treated with DAAs in Asia by country

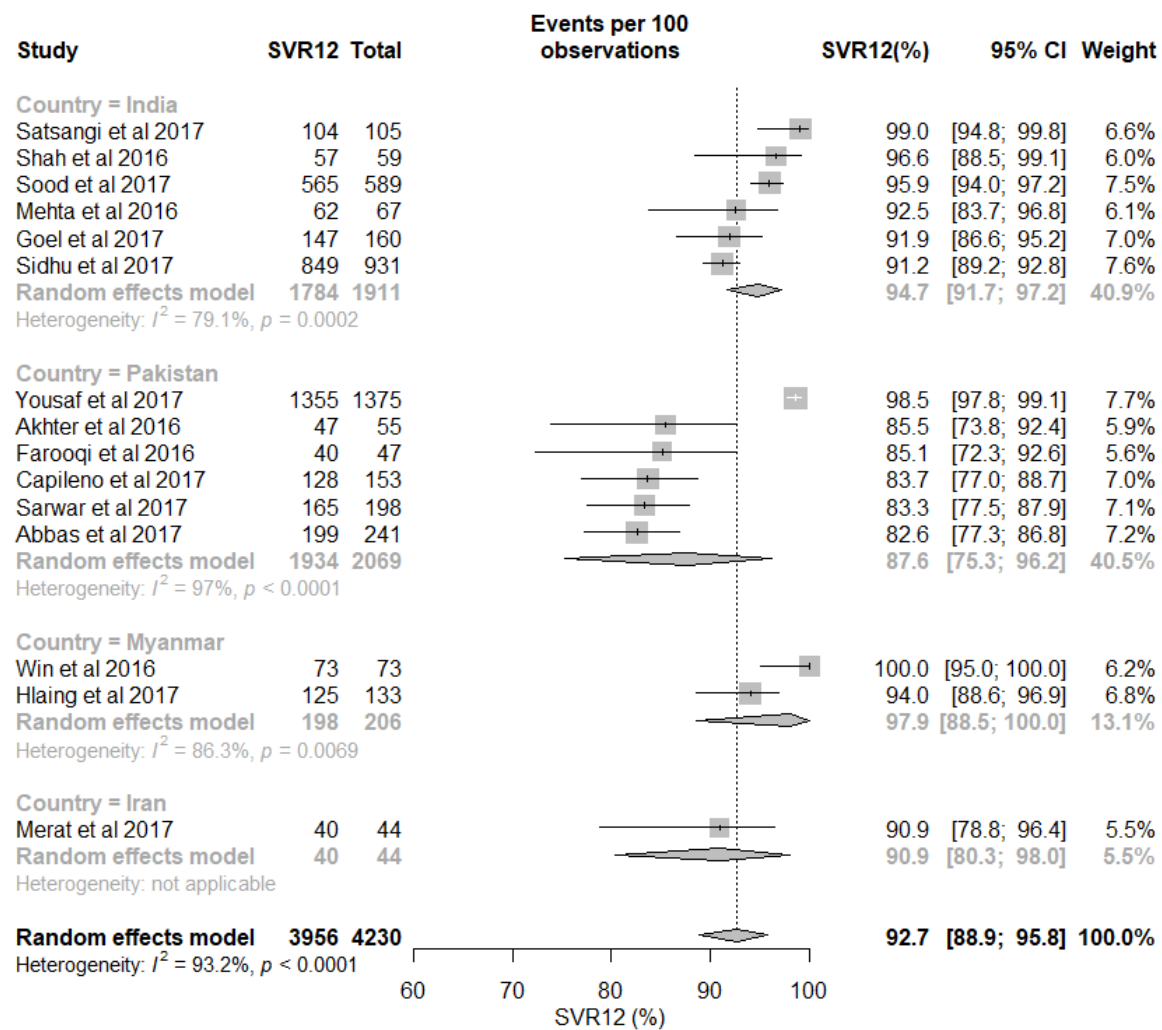



**Online Supplementary 8:** Supplemental List 1: List of Asian countries and areas included in literature search based on PubMed MeSH term for Asia

## **Asia Countries and Asia Areas**

### **Asia, Central**

- Kazakhstan
- Kyrgyzstan
- Tajikistan
- Turkmenistan
- Uzbekistan

### **Asia, Northern**

- Siberia

### **Asia, Southeastern**

- Borneo
- Brunei
- Cambodia
- Indonesia
- Laos
- Malaysia
- Mekong Valley
- Myanmar
- Philippines
- Singapore
- Thailand
- Timor-Leste
- Vietnam

### **Asia, Western**

- Bangladesh
- Bhutan
- India
- Afghanistan
- Bahrain
- Iran
- Iraq
- Israel
- Jordan
- Kuwait
- Lebanon
- Oman
- Qatar
- Saudi Arabia
- Syria
- Turkey
- United Arab Emirates
- Yemen
- Nepal
- Pakistan
- Sri Lanka

## **Far East**

- China
- Japan
- Korea
- Mongolia
- Taiwan
